# Supplementary material for: Transforming “cold” tumors into “hot” ones via immunogenic cell death by bufadienolides for reverse immunosuppressive TME in HCC
Source: Royal Society of Chemistry journal article supplement (doi:10.1039/d5tb00305a), 2025-01-01
Supplement: d5tb00305a1.pdf [file d5tb00305a1.pdf]

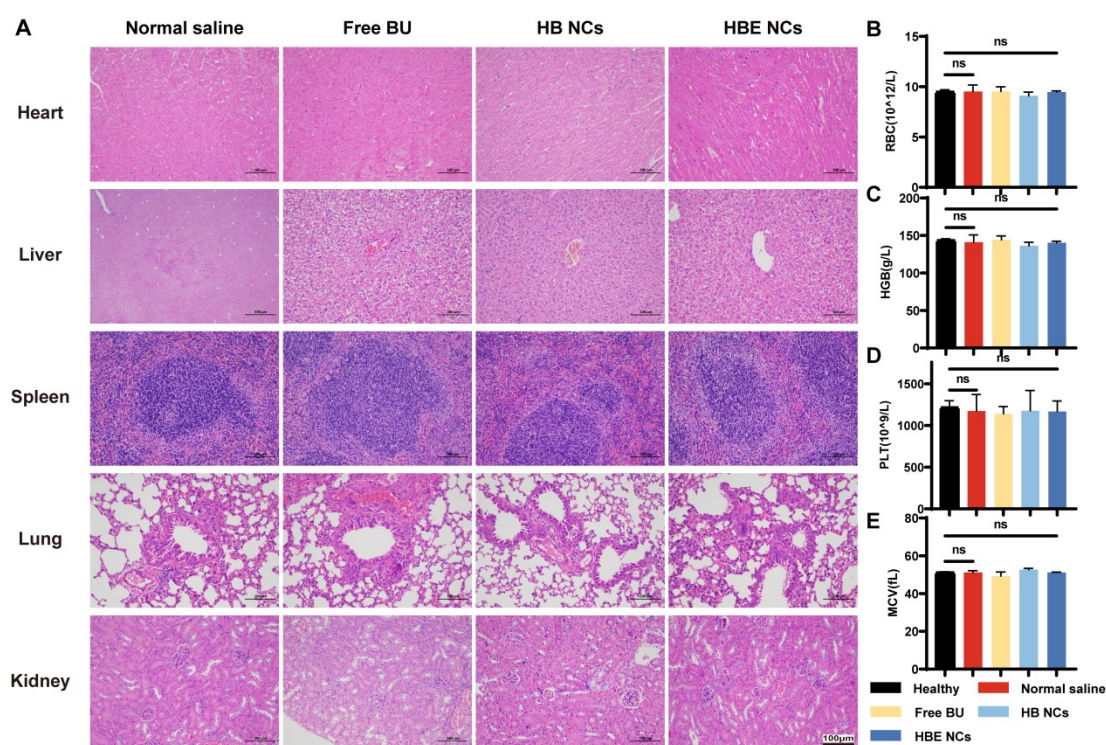

**Figure S1.** In vivo safety evaluation in mice.(A)H&E staining on various tissues in tumour-bearing mice after diferent treatments . (Scale: 50 μm).Serum biochemistry assay of(B)RBC.(C)HGB(D)PLT(E)MCV.The data are presented as the mean ± SD. The p values are calculated using two-tailed unpaired t test or one-way analysis of variance (ANOVA), \*p < 0.05, \*\*p < 0.01, and \*\*\*p < 0.001.

**Table S1**

Pharmacokinetic parameters of BU, HB NCs and HBE NCs in rats (Mean±SD, n = 5).

|         | AUC <sub>(0-∞)</sub> (μg/L*h) | MRT <sub>(0-∞)</sub> (h) | t <sub>1/2</sub> (h) | T <sub>max</sub> (h) | C <sub>max</sub> (μg/L) |
|---------|-------------------------------|--------------------------|----------------------|----------------------|-------------------------|
| Free BU | 7791.50±3641.99               | 8.36±6.33                | 5.75±6.32            | 2.60±2.89            | 2278.43±968.02          |
| HB NCs  | 28750.47±14899.30*            | 4.12±1.67                | 3.55±1.62            | 0.50±0.36**          | 20107.62±18250.21***    |
| HBE NCs | 52173.05±38756.29**           | 4.38±0.58                | 2.31±0.42**          | 0.40±0.41**          | 24796.16±17139.91***    |

AUC<sub>(0-∞)</sub> : area under the curve from 0 to ∞; MRT<sub>(0-∞)</sub> : mean retention time from 0 to ∞; t<sub>1/2</sub> : half-life; T<sub>max</sub> : peak time; C<sub>max</sub> : peak concentration.

\*p < 0.05, \*\*p < 0.01, \*\*\*p < 0.001 compared with Free BU group
